# Supplementary material for: Chiral liquid chromatography-mass spectrometry (LC-MS/MS) method development with β-cyclodextrin (β-CD) derivatized chiral stationary phase for the enhanced separation and determination of flurbiprofen enantiomers: application to a stereoselective pharmacokinetic study
Source: Royal Society of Chemistry journal article supplement (doi:10.1039/d0nj01516d), 2020-01-01
Supplement: d0nj01516d1.pdf [file d0nj01516d1.pdf]

Chiral liquid chromatography–mass spectrometry (LC–MS/MS) method development with  $\beta$ -cyclodextrin ( $\beta$ -CD) derivatized chiral stationary phase for the enhanced separation and determination of flurbiprofen enantiomers: Application to a stereoselective pharmacokinetic study

Jiayi Sun, Beibei Liu, Liangzhao Cai, Jia Yu\*, Xingjie Guo\*

Journal in which to be published: New Journal of Chemistry

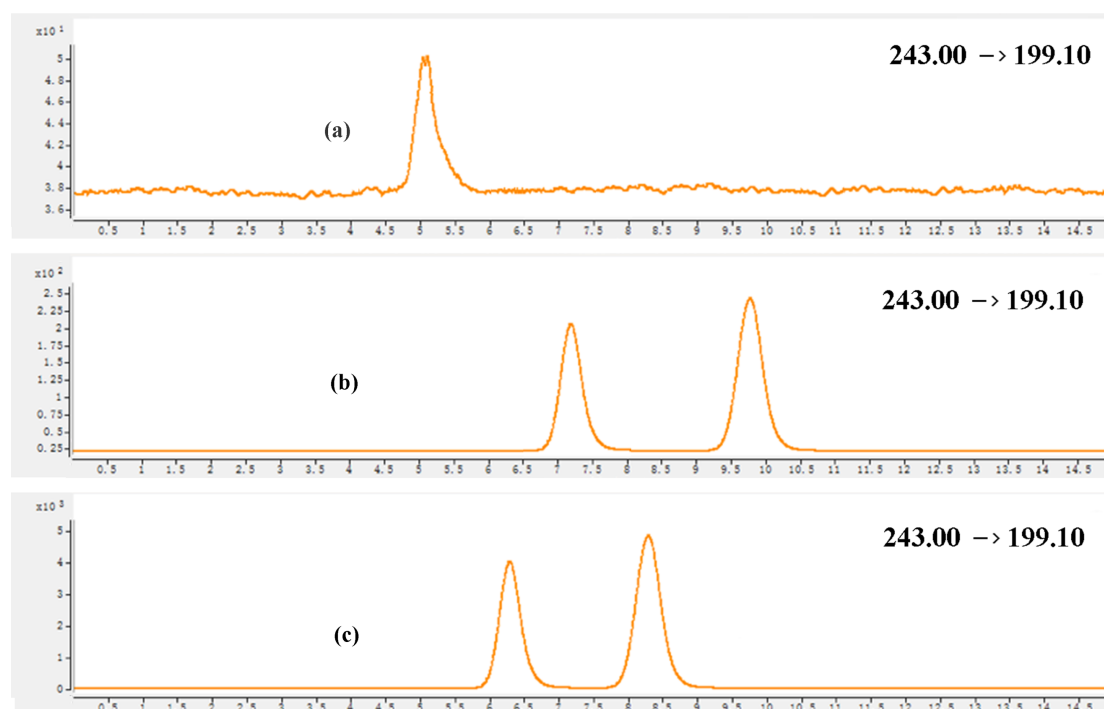

Fig.S1 Typical MRM chromatograms under different mobile phase conditions. (a) ACN-water (60:40, v/v); (b) MeOH-0.1% formic acid (70:30, v/v); (c) MeOH-5 mM ammonium acetate (70:30, v/v)
